# Supplementary material for: Optical chemosensors for Hg2+from terthiophene appended rhodamine derivatives: FRET based molecular and in situ hybrid gold nanoparticle sensors
Source: Royal Society of Chemistry journal article supplement (doi:10.1039/c4nj00412d), 2014-05-29
Supplement: c4nj00412d1.pdf [file c4nj00412d1.pdf]

## Electronic Supplementary Information

### Optical chemosensors for Hg<sup>2+</sup> from terthiophene appended rhodamine derivatives : FRET based molecular and *in situ* hybrid gold nanoparticles sensors

Chatthai Kaewtong,<sup>\*,†</sup> Noi Niamsa,<sup>†</sup> Banchob Wanno,<sup>†</sup> Nongnit Morakot,<sup>†</sup> Buncha Pulpoka<sup>‡</sup> and Thawatchai Tuntulani<sup>‡</sup>

<sup>†</sup>Nanotechnology Research Unit and Supramolecular Chemistry Research Unit, Department of Chemistry and Center of Excellence for Innovation in Chemistry, Faculty of Science, Mahasarakham University, Mahasarakham, 44150, Thailand. Fax: 66 0437 54246; Tel: 66 0437 54246; E-mail:

[kchatthai@gmail.com](mailto:kchatthai@gmail.com)

<sup>‡</sup>Supramolecular Chemistry Research Unit, Department of Chemistry, Faculty of Science, Chulalongkorn University, Bangkok 10330, Thailand. Fax: 66 0221 87598; Tel: 66 0221 87643.

## Contents

|                                                                                                                                                                                                 |    |
|-------------------------------------------------------------------------------------------------------------------------------------------------------------------------------------------------|----|
| <b>Figure S1.</b> Color changes (A, B, C) and fluorescence changes (a, b, c) of <b>RhoT</b> (10 mM) in the presence of 10 $\mu$ M of various metals.                                            | S3 |
| <b>Figure S2.</b> $^1\text{H}$ NMR spectra of RhoT in DMSO- $d_6$ in the presence (a) and absence (b) of $\text{Hg}^{2+}$ .                                                                     | S3 |
| <b>Figure S3.</b> Absorption spectra changes of <b>RhoT</b> (10 $\mu$ M) in 0.01 mol/L of TBAPF <sub>6</sub> in DMSO to 10 $\mu$ M of various cations.                                          | S4 |
| <b>Table S1.</b> Complexation energies obtained at the B3LYP/LanL2DZ level of theory.                                                                                                           | S4 |
| <b>Table S2.</b> Energy gaps ( $E_{\text{gap}}$ , in eV) of ligand and its complexes obtained at the B3LYP/LanL2DZ level of theory.                                                             | S4 |
| <b>Figure S4.</b> Plots of HOMO (left) and LUMO (right) orbitals of (a) L, (b) L- $\text{Hg}^{2+}$ (1:1) and (c) 2L- $\text{Hg}^{2+}$ (2:1)                                                     | S5 |
| <b>Figure S5.</b> UV-vis absorption spectra of rhodamine functionalized with terthiophene ( <b>RhoT</b> ) $10^{-3}$ M before and after treated with $\text{AuCl}_3$ at different time           | S5 |
| <b>Figure S6</b> (a) Absorption spectra and (b) fluorescence spectra <b>AuNPs-RhoT</b> in 50:50, DMSO:H <sub>2</sub> O in the presence of different amounts of $\text{Hg}^{2+}$ , $E_x=520$ nm. | S6 |
| <b>Figure S7.</b> $^1\text{H}$ NMR spectrum of N-(rhodamine B)lactam-ethylenediamine ( <b>Rho</b> ).                                                                                            | S7 |
| <b>Figure S8.</b> Mass spectrum of fluorescent chemosensor ( <b>RhoT</b> ).                                                                                                                     | S7 |
| <b>Figure S9.</b> $^1\text{H}$ NMR of fluorescent chemosensor ( <b>RhoT</b> ).                                                                                                                  | S8 |

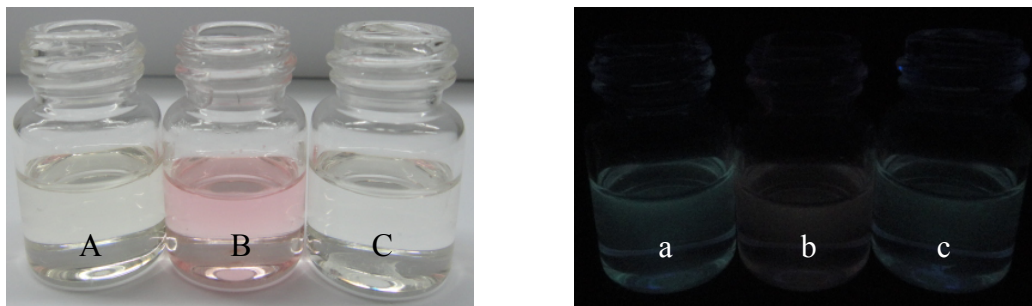

**Figure S1.** Color changes (A, B, C) and fluorescence changes (a, b, c) of **RhoT** (10 mM) in the presence of 10  $\mu$ M of various metals. (A, a) **RhoT** only, (B, b) **RhoT** +  $\text{Hg}^{2+}$ , (C, c) **RhoT** + other metals.

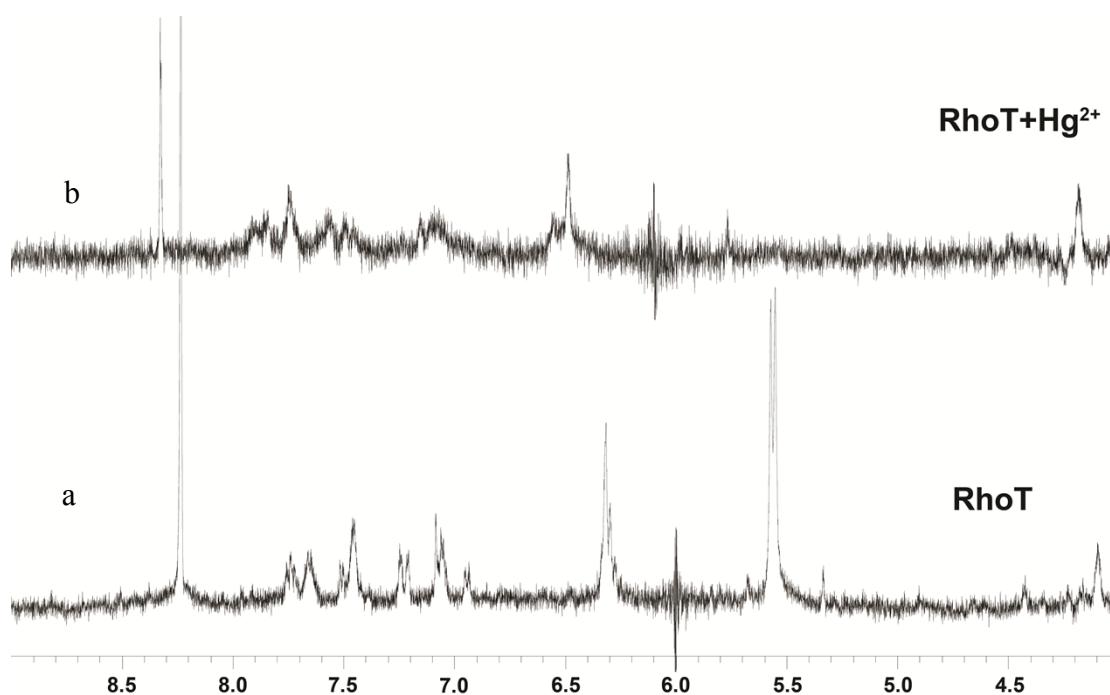

**Figure S2.**  $^1\text{H}$  NMR spectra of RhoT in  $\text{DMSO-d}_6$  in the absence (a) and presence (b) of  $\text{Hg}^{2+}$ .

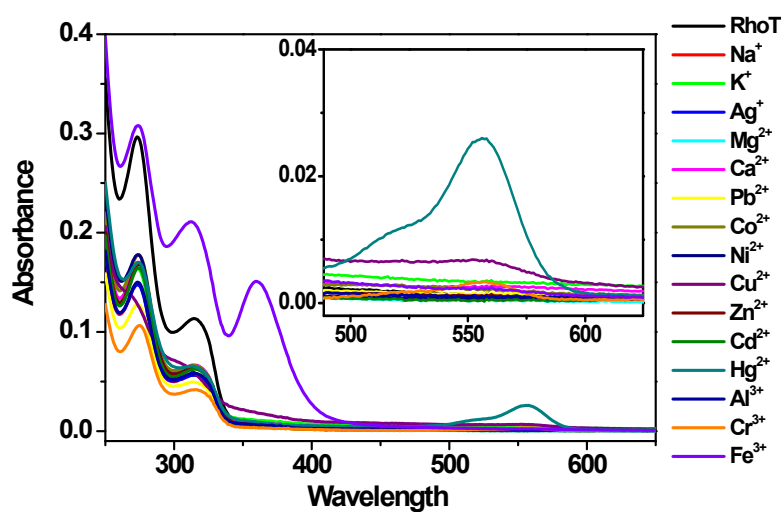

**Figure S3.** Absorption spectra changes of **RhoT** (10  $\mu$ M) in 0.01 mol/L of TBAPF<sub>6</sub> in DMSO to 10  $\mu$ M of various cations.

**Table S1.** Complexation energies obtained at the B3LYP/LanL2DZ level of theory.

| Complexation                                                               | $\Delta E$ (kcal/mol) |
|----------------------------------------------------------------------------|-----------------------|
| <b>RhoT</b> + Hg <sup>2+</sup> $\rightarrow$ <b>RhoT•Hg<sup>2+</sup></b>   | -276.28               |
| <b>2RhoT</b> + Hg <sup>2+</sup> $\rightarrow$ <b>2RhoT•Hg<sup>2+</sup></b> | -350.47               |

**Table S2.** Energy gaps ( $E_{\text{gap}}$ , in eV) of ligand and its complexes obtained at the B3LYP/LanL2DZ level of theory.

|                              | $E_{\text{HOMO}}$ | $E_{\text{LUMO}}$ | $E_{\text{gap}}$ |
|------------------------------|-------------------|-------------------|------------------|
| <b>RhoT</b>                  | -5.306            | -1.769            | 3.537            |
| <b>RhoT-Hg<sup>2+</sup></b>  | -9.497            | -9.089            | 0.408            |
| <b>2RhoT-Hg<sup>2+</sup></b> | -8.626            | -5.769            | 2.857            |

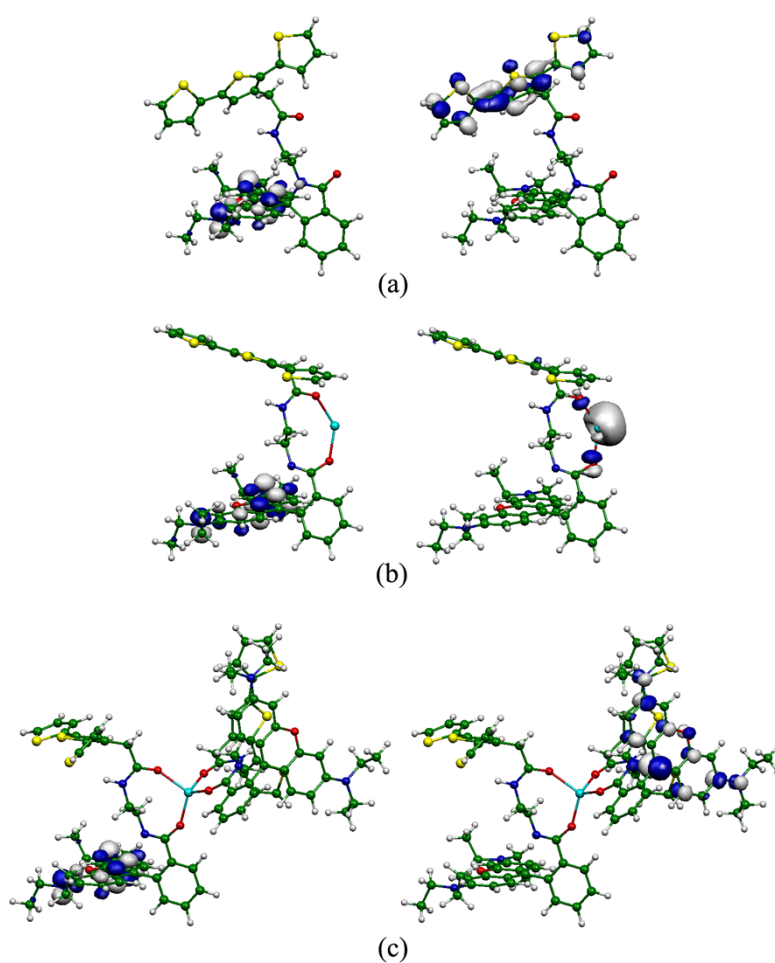

**Figure S4.** Plots of HOMO (left) and LUMO (right) orbitals of (a) **L**, (b) **L-Hg<sup>2+</sup>** (1:1) and (c) **2L-Hg<sup>2+</sup>** (2:1) obtained at the B3LYP/LanL2DZ level of theory, the O-Hg bond distances are in Å.

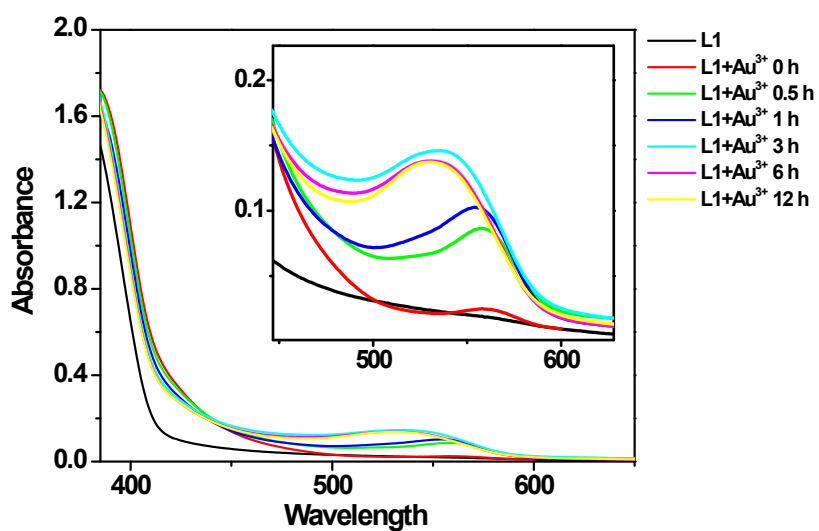

**Figure S5.** UV-vis absorption spectra of rhodamine functionalized with terthiophene (**RhoT**) 10<sup>-3</sup> M before and after treated with AuCl<sub>3</sub> at different time (0–12 hour). AuNPs showed their characteristic absorption bands at 570 nm.

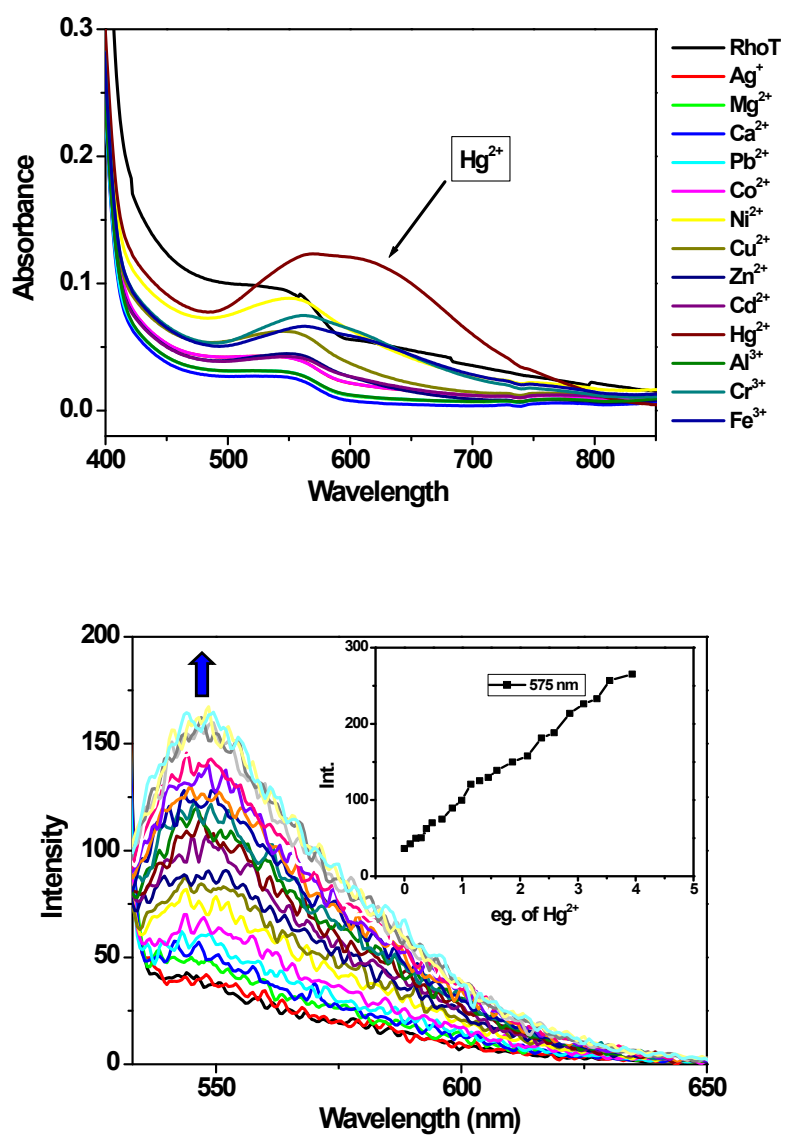

**Figure S6** (a) Absorption spectra and (b) fluorescence spectra **AuNPs-RhoT** in 50:50, DMSO:H<sub>2</sub>O in the presence of different amounts of Hg<sup>2+</sup>, E<sub>x</sub>=520 nm.

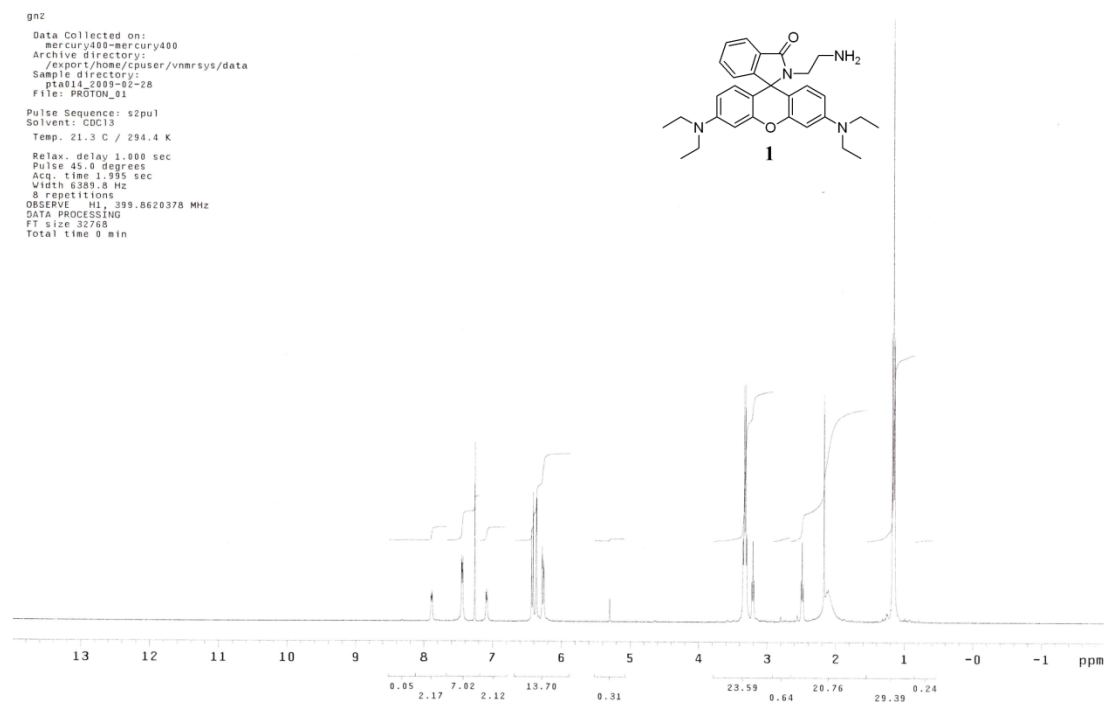

**Figure S7.**  $^1\text{H}$  NMR spectrum of N-(rhodamine B)lactam-ethylenediamine (**Rho**).

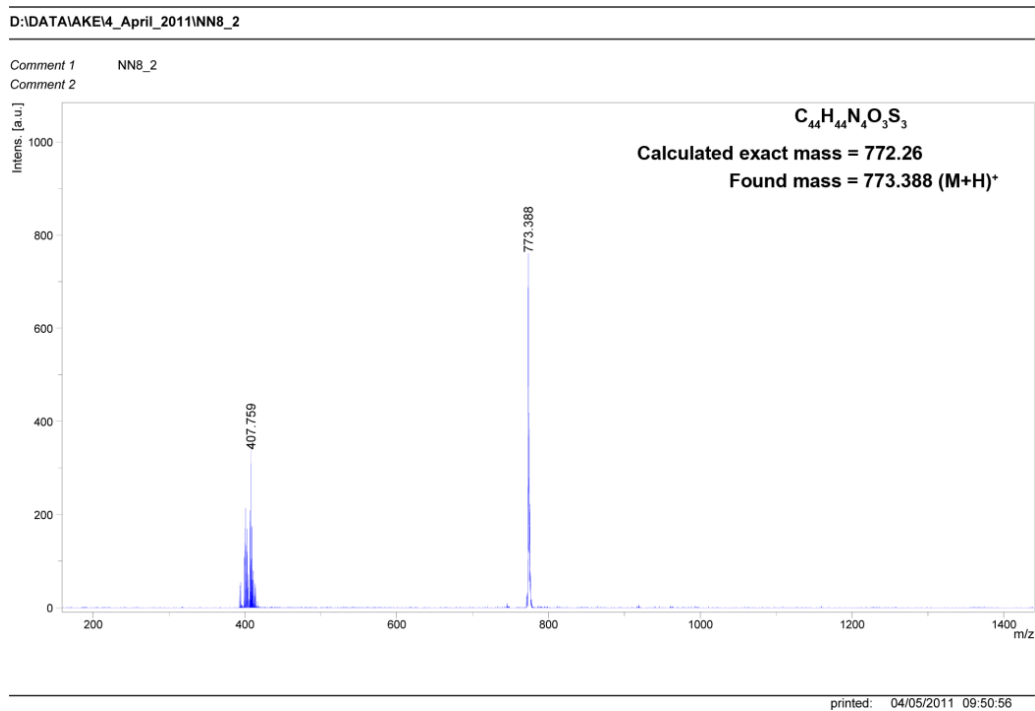

**Figure S8.** Mass spectrum of fluorescent chemosensor (**RhoT**).

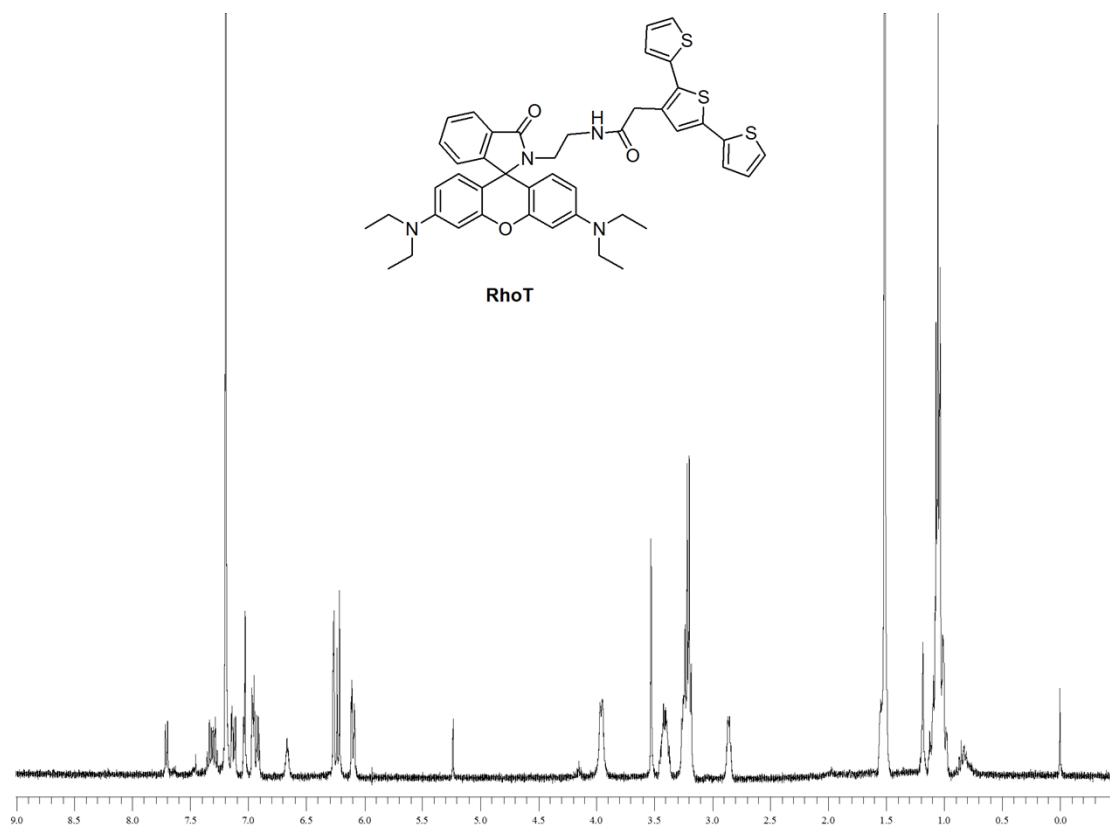

**Figure S9.** <sup>1</sup>H NMR of fluorescent chemosensor (**RhoT**).
